# Supplementary material for: Extensive analysis of native and non-native Centaurea solstitialis L. populations across the world shows no traces of polyploidization
Source: PeerJ. 2017 Aug 14;5:e3531. doi: 10.7717/peerj.3531 (PMC5560225; doi:10.7717/peerj.3531)
Supplement: Table S1 [file peerj-05-3531-s001.xlsx]

## Sheet: TableS1
Table S1: Geographic locations of Centaurea solstitialis populations sampled for genome size and ploidy assessment. N is the number of individuals analyzed in each population for genome size and ploidy level. Geographic coordinates are given in WSG84 format. Mean genome size per population in units of mass (picograms), standard deviation and standard error are also provided.
ID	Region	Province/County	Location	Latitude	Longitude	Sample size (N)	Mean genome size (pg)	Standard Deviation	Standard Error
1	Turkey	Denizli	Pınarkent	37.8028	29.1953	10	1.73667	0.0305505	0.0176383
2	Turkey	Afyonkarahisar	Dazkırı	37.9508	29.8403	9	1.725	0.0777817	0.055
3	Turkey	Isparta	Isparta	37.8984	30.4383	9	1.815	0.0919239	0.065
4	Turkey	Burdur	Burdur	37.6161	30.1462	8	1.72	0.0282843	0.02
5	Turkey	Denizli	Serinhisar	37.5316	29.3009	7	NA	NA	NA
6	Turkey	Afyonkarahisar	Dinar to Çay	38.1539	30.2342	9	1.64	0.0565685	0.04
7	Turkey	Izmir	Beydağ	38.0859	28.2155	9	1.65333	0.0416333	0.024037
8	Turkey	Izmir	Bozdağ	38.3014	28.0499	10	1.78667	0.0321455	0.0185592
9	Turkey	Aydın	Akçaköy	37.9529	28.03	4	1.805	0.05	0.025
10	Turkey	Aydın	Geyre	37.7123	28.6927	9	1.726	0.0550454	0.0246171
11	Spain	Cuenca	Moncalvillo de Huete	40.2416	-2.68745	10	1.66	0.0818535	0.0472582
12	Spain	Teruel	Noguera de Albarracín	40.4616	-1.61551	7	NA	NA	NA
13	Spain	Tarragona	Batea	41.0688	0.334305	10	1.70333	0.0907377	0.0523874
14	Spain	Lleida	L´Espluga-Calba	41.505	1.00586	9	1.70667	0.0472582	0.0272845
15	Spain	Salamanca	Castellanos de Moriscos	41.0261	-5.60518	10	1.65667	0.102632	0.0592546
16	Spain	Burgos	La Horra	41.7288	-3.83435	10	1.66667	0.046188	0.0266667
17	Spain	Burgos	Burgos	42.3839	-3.67894	10	1.725	0.0506623	0.0253311
18	Spain	Valladolid	Castronuño	41.3925	-5.27696	10	1.76667	0.0404145	0.0233333
19	Spain	Zaragoza	Sástago	41.4082	-0.289773	10	1.73333	0.0907377	0.0523874
20	Spain	Salamanca	Doñinos de Salamanca	40.9685	-5.77332	10	1.76333	0.0351189	0.0202759
21	Chile	Talagante	Comuna Padre Hurtado	-33.5708	-70.8553	9	1.685	0.0494975	0.035
22	Chile	Talagante	Comuna El Monte	-33.6894	-71.0553	10	1.73333	0.0503322	0.0290593
23	Chile	Santiago	Comuna Maipú	-33.5247	-70.7517	8	1.714	0.0939681	0.0420238
24	Chile	Santiago	Comuna Lo Barnechea	-33.37	-70.4297	9	1.735	0.0353553	0.025
25	Argentina	La Pampa	Paraje El Tropezón, R14	-36.709	-64.8311	9	1.75	0.127279	0.09
26	Argentina	La Pampa	El Durazno, R14 km 189	-36.7001	-65.3914	10	1.72	0.04	0.023094
27	Argentina	La Pampa	Rucanelo, R11 y R10	-36.7089	-64.8308	10	1.72	0.0360555	0.0208167
28	Argentina	La Pampa	Victorica	-36.2501	-65.4543	10	1.72667	0.0832666	0.048074
29	Argentina	La Pampa	Winifreda	-36.224	-64.2813	10	1.72333	0.0585946	0.0338296
30	Argentina	La Pampa	Santa Rosa	-36.6166	-64.2562	10	1.73	0.0953939	0.0550757
31	Argentina	La Pampa	Trenel, R35 km 426	-35.7246	-64.2693	10	1.78	0.03	0.0173205
32	Argentina	La Pampa	Quehué, R 35 y R18	-37.1216	-64.2866	10	1.67333	0.125033	0.072188
33	Argentina	La Pampa	Unanue, R35 km 215	-37.5597	-64.2915	10	1.71333	0.0763763	0.0440959
34	Argentina	La Pampa	Lonquimay, R1 km 203	-36.5655	-63.6647	10	1.75	0.01	0.0057735
35	California	Sacramento	Folsom	38.6422	-121.176	10	1.7775	0.04272	0.02136
36	California	Sacramento	Folsom	38.682934	-121.181127	1	1.64	NA	NA
37	California	Santa Clara	San José	37.243	-122.871	8	1.64333	0.0550757	0.031798
38	California	Marin	Novato	38.1562	-122.693	4	1.66	NA	NA
39	California	Solano	Green Valley	38.2095	-122.146	10	1.76667	0.0750555	0.0433333
40	California	Sonoma	Petaluma	38.2246	-122.534	10	1.71	0.043589	0.0251661
41	California	Sonoma	Petaluma	38.2364	-122.564	8	1.685	0.0443471	0.0221736
42	California	Napa	Napa	38.339	-122.155	10	1.69	0.0787401	0.03937
43	California	Solano	Vacaville	38.4106	-121.934	10	1.82667	0.0404145	0.0233333
44	California	Napa	Napa	38.4535	-122.153	10	1.7675	0.0492443	0.0246221
45	Australia	NSW	Colbinabbin	-36.5955	144.736	8	1.665	0.058023	0.0290115
46	Australia	NSW	Hume, 5km N of Holbrook	-36.6778	147.37	7	1.68333	0.0550757	0.031798
47	Australia	NSW	Gundagai	-35.0672	148.109	9	1.725	0.0212132	0.015
48	Australia	NSW	Gundagai	-34.8447	148.295	10	1.8	0.0264575	0.0152753
49	Australia	NSW	18 km N of Cudal	-33.2219	148.909	2	1.72667	0.0351189	0.0202759
50	Australia	NSW	Koorawatha	-34.0168	148.569	10	1.67	0.0264575	0.0152753
51	Australia	NSW	Murringo	-34.3192	148.493	10	1.68333	0.0950438	0.0548736
52	Australia	NSW	Yass	-34.874	148.908	10	1.71333	0.0550757	0.031798
